# Supplementary material
Source: Springer Nature journal article supplement (https://www.springermedizin.de/resource/supplementary/12990_2008_184_MOESM8_ESM.pdf/9612758)

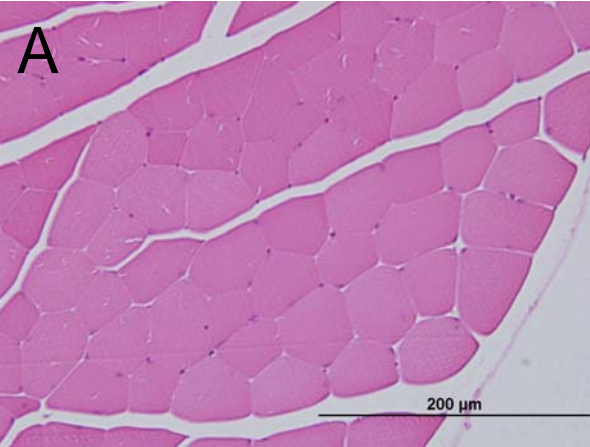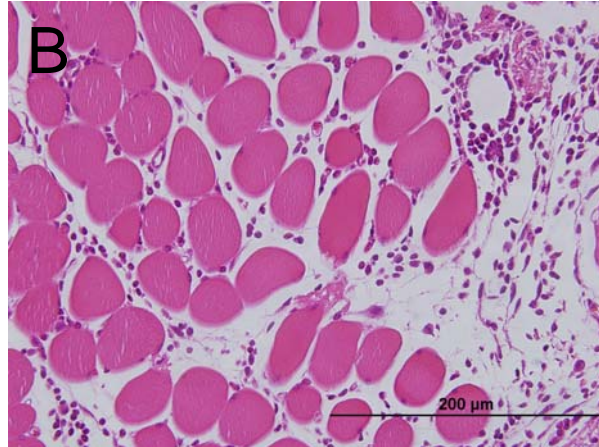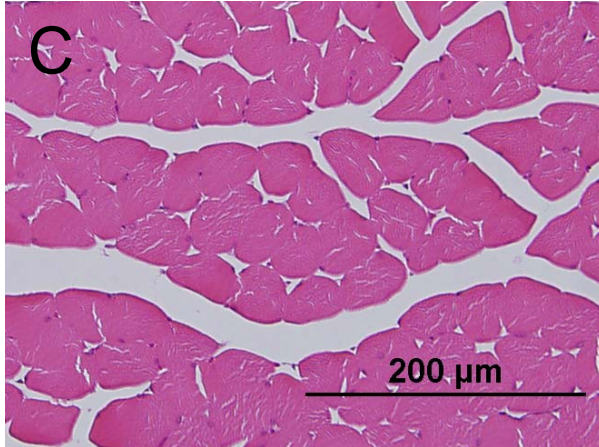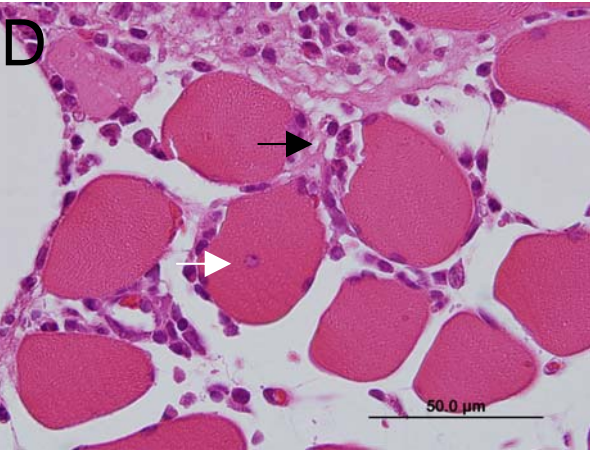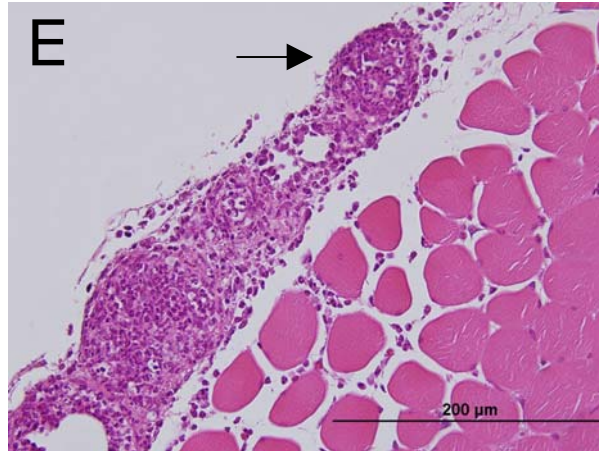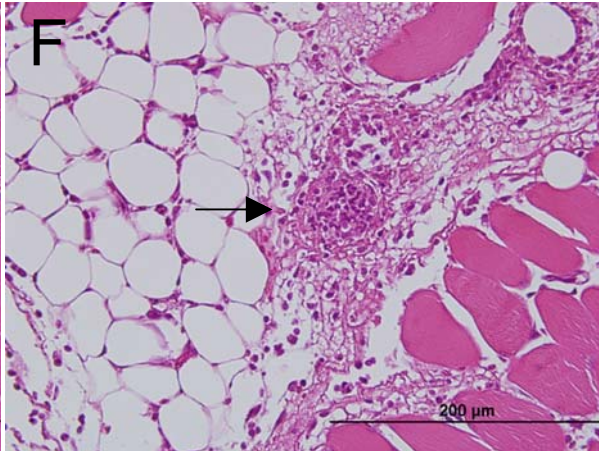

Supplement: MOESM8 [file 9612758]
